# Supplementary material
Source: publisher site journal article supplement (https://static.cambridge.org/content/id/urn:cambridge.org:id:article:S2059866119004345/resource/name/S2059866119004345supp004.xlsx)
Supplement: Supplementary file 1 [file S2059866119004345supp004.xlsx]

## Sheet: Public Health Journals
30 Top Public Health Journals
Rank	Full Journal Title	Total Cites	Impact Factor	Eigenfactor Score
1	Lancet Global Health	4455	18.705	0.02432
2	MMWR-MORBIDITY AND MORTALITY WEEKLY REPORT	24208	12.888	0.09183
3	Annual Review of Public Health	5847	9.491	0.00901
4	INTERNATIONAL JOURNAL OF EPIDEMIOLOGY	21401	8.36	0.04642
5	ENVIRONMENTAL HEALTH PERSPECTIVES	39741	8.309	0.04399
6	EPIDEMIOLOGIC REVIEWS	3422	7.583	0.00358
7	BULLETIN OF THE WORLD HEALTH ORGANIZATION	15375	6.361	0.01836
8	JOURNAL OF TOXICOLOGY AND ENVIRONMENTAL HEALTH-PART B-CRITICAL REVIEWS	1665	6.333	0.00175
9	EPIDEMIOLOGY	12660	4.991	0.02012
10	INTERNATIONAL JOURNAL OF HYGIENE AND ENVIRONMENTAL HEALTH	4282	4.848	0.00636
11	ENVIRONMENTAL RESEARCH	13420	4.732	0.02179
12	CANCER EPIDEMIOLOGY BIOMARKERS & PREVENTION	19976	4.554	0.02944
13	Travel Medicine and Infectious Disease	1230	4.45	0.00361
14	INDOOR AIR	4382	4.396	0.00493
15	AMERICAN JOURNAL OF PUBLIC HEALTH	37368	4.38	0.06619
16	Environmental Health	4486	4.376	0.01068
17	AMERICAN JOURNAL OF EPIDEMIOLOGY	37181	4.322	0.04223
18	NICOTINE & TOBACCO RESEARCH	8476	4.291	0.02212
19	JOURNAL OF CLINICAL EPIDEMIOLOGY	24063	4.245	0.02723
20	Journal of Global Health	754	4.195	0.00328
21	TOBACCO CONTROL	6643	4.151	0.01556
22	AMERICAN JOURNAL OF PREVENTIVE MEDICINE	20455	4.127	0.03933
23	JOURNAL OF ADOLESCENT HEALTH	14174	4.098	0.0264
24	AIDS PATIENT CARE AND STDS	3622	4.041	0.00676
25	JOURNAL OF EPIDEMIOLOGY AND COMMUNITY HEALTH	13779	3.973	0.01834
26	OCCUPATIONAL AND ENVIRONMENTAL MEDICINE	8486	3.965	0.01028
27	Clinical Epidemiology	2200	3.799	0.00969
28	PALLIATIVE MEDICINE	4636	3.78	0.00858
29	Journal of Occupational Health Psychology	3320	3.766	0.00465
30	NEUROEPIDEMIOLOGY	3261	3.697	0.00564
